# Supplementary material
Source: MDPI journal article supplement (https://www.mdpi.com/2072-4292/11/23/2726)
Supplement: s1 [file s1]

## Supplementary Materials:

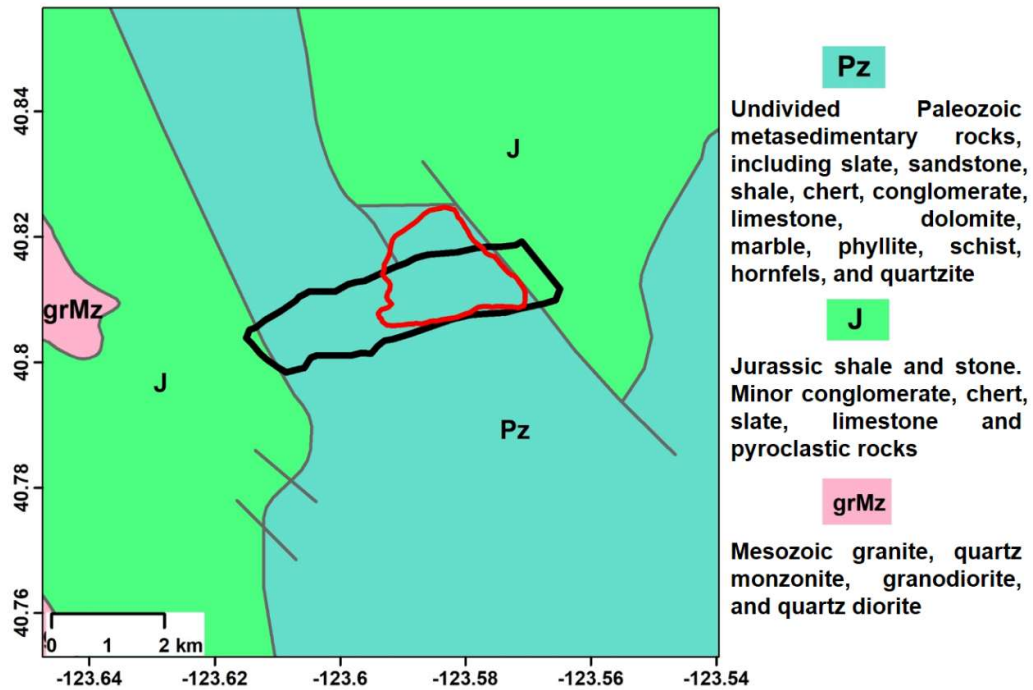

Figure S1. Geologic units of the study area modified from geological map of California (2010). The gray lines show the faults. It should be noted that the geologic terrane boundaries on this map are also faults.
